# Supplementary material for: Engineering defective MOF-801 nanostructures on the surface of a calcium alginate aerogel for efficient and stable atmospheric water harvesting
Source: Royal Society of Chemistry journal article supplement (doi:10.1039/d4ta06139j), 2024-01-01
Supplement: d4ta06139j1.pdf [file d4ta06139j1.pdf]

## Supporting Information

1

### 2 **Engineering of Defective MOF-801 Nanostructures on the Surface of** 3 **Calcium Alginate Aerogel for Efficient and Stable Atmospheric Water** 4 **Harvesting**

5 Cai-Hua Liu<sup>1</sup>, Lei Xu<sup>1\*</sup>, Zhen-Yu Wang<sup>1</sup>, Sheng-Jie Han<sup>1</sup>, Yi-Bin Li<sup>1</sup>, Ming-Lai Fu<sup>1\*</sup>, Baoling  
6 Yuan<sup>1,2\*</sup>

7

8 <sup>1</sup>*Xiamen Key Laboratory of Municipal and Industrial Solid Waste Utilization and Pollution*  
9 *Control, College of Civil Engineering, Huaqiao University, Xiamen, Fujian 361021, P.R. China*

10 <sup>2</sup>*Key Laboratory of Songliao Aquatic Environment, Ministry of Education, Jilin Jianzhu*  
11 *University, Changchun, 130118, P.R. China*

12

---

\*Corresponding authors. Tel: +86 592 616 2780

E-mail address: [mlfu@hqu.edu.cn](mailto:mlfu@hqu.edu.cn); [lxu@hqu.edu.cn](mailto:lxu@hqu.edu.cn); [yuanbl@hotmail.com](mailto:yuanbl@hotmail.com)

---

13 **Text S1.**

14 The water adsorption capacity of the samples was evaluated based on the change in real-  
15 time mass from the initial mass, and the following formula was used to calculate the amount of  
16 water adsorbed:

17 
$$B = \frac{m_e - m_s}{m_s} \quad (S1)$$

18 where  $B$  denotes the amount of water adsorbed by the water-collecting material in the  
19 experiment ( $\text{g} \cdot \text{g}^{-1}$ ),  $m_s$  denotes the initial dry weight of the water collecting material (g), and  $m_e$   
20 denotes the total mass of water vapor after adsorption (g).

21 The desorption rate of water in the experiment can be calculated by the following equation:

22 
$$\eta = \frac{m_e - m_i}{m_e - m_s} \quad (S2)$$

23 where  $\eta$  is the desorption rate of water in the desorption experiment,  $m_s$  denotes the initial  
24 dry weight of the water collecting material (g),  $m_e$  denotes the total mass of water vapor after  
25 adsorption (g), and  $m_i$  is the real-time mass of the sample during desorption (g).

26

---

27 **Text S2.** Calculation method of defects in MOF-801 and MOF-801-G.

28 Thermogravimetric (TG) tests were performed according to reported methods to analyze  
29 the chemical structure of MOF.<sup>1-3</sup> The oxidative decomposition of defect-free MOF-801  
30 follows the following chemical reaction equation, assuming complete decomposition of MOF-  
31 801 to ZrO<sub>2</sub> at 650 °C:

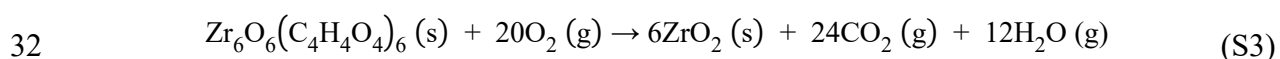

33 Therefore, six equivalents of ZrO<sub>2</sub> are produced for each equivalent of Zr<sub>6</sub>O<sub>6</sub>(FA)<sub>6</sub>.

34 When the solvents were formic acid, respectively, the defectivity of the MOF-801 structure was  
35 calculated as follows:

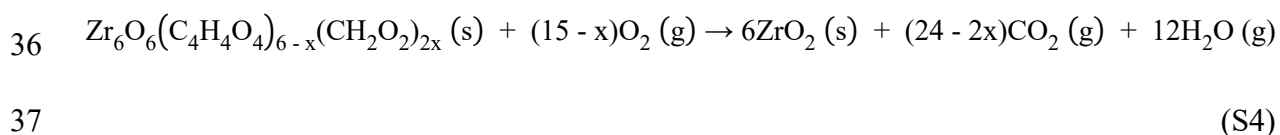

38 where x is the number of missing ligands at the MOF-801 defective site. According to Eq.  
39 S4, similar to that of the defect-free Zr-MOF, in the case of complete disassembly, each  
40 equivalent of Zr-MOF, i.e., MOF-801 and MOF-801-G, would be converted to six equivalents  
41 of ZrO<sub>2</sub>. The ratio of the theoretical Zr-MOF mass to the mass of the six of ZrO<sub>2</sub> (remaining  
42 ash) was calculated. These values were then compared to the experimental mass loss and the  
43 value of x was calculated. The calculated values of x in MOF-801 and MOF-801-G were 0.453  
44 and 2.748, respectively.

45

---

46 **Text S3.**

47 Water vapor adsorption isotherms were determined on MOF-801-G and P0.5MC aerogels  
48 using a Micromeritics ASAP 2460 instrument. The adsorption isotherms of water vapor (with  
49 P0 values of 3.157 kPa and 5.60 kPa, respectively) were measured in the vapor state at  
50 temperatures of 25 °C (298 K) and 35 °C (308 K). The heat of adsorption was calculated from  
51 the following *Clausius-Clapeyron* equation.

$$52 \quad Q_{st} = \frac{RT_1T_2}{T_2 - T_1}(\ln P_2 - \ln P_1) \quad (S5)$$

53 where  $Q_{st}$  is the heat of adsorption ( $\text{J mol}^{-1}$ ),  $R$  is the ideal gas constant ( $8.134 \text{ J mol}^{-1} \text{ K}^{-1}$ ),  
54  $T_1$  and  $T_2$  denote the temperature of the system at two different temperatures (K), and  $P_1$  and  
55  $P_2$  denote the saturated vapor pressure of water vapor at two different temperatures.

56

---

57 **Text S4.** Calculation of the equivalent evaporation enthalpy of water in gels.

58 
$$U_{in} = h_{vap} \times m_0 = h_g \times m_g \quad (S6)$$

59 where  $U_{in}$  (J) is the equivalent enthalpy of evaporation of water inside the gel;  $h_{vap}$  and  $h_g$

60 ( $J \cdot g^{-1}$ ) are the enthalpies of evaporation of pure water and water inside the gel, respectively; and

61  $m_0$  and  $m_g$  (g) are the mass changes of pure water and water inside the gel, respectively, at dark.

62

---

63 **Text S5.** Calculation of the solar vapor conversion efficiency of the gels.

64 
$$\eta = \frac{m(L_v + Q)}{P_{in}} \quad (S7)$$

65 
$$Q = C(T_1 - T_2) \quad (S8)$$

66 where  $\eta$  is the solar vapor conversion efficiency.  $m$  ( $\text{kg}\cdot\text{m}^{-2}\cdot\text{h}^{-1}$ ) is the unit mass flow of  
67 the water body under light, which is equal to the difference between the mass flow of the  
68 evaporation system under light ( $m_{light}$ ) and without light ( $m_{dark}$ ).  $L_v$  ( $\text{kJ}\cdot\text{kg}^{-1}$ ) is the latent heat of  
69 vaporization of water, normally  $2256 \text{ kJ}\cdot\text{kg}^{-1}$  is used in the region of interest,  $Q$  ( $\text{kJ}\cdot\text{kg}^{-1}$ ) is the  
70 energy provided to heat the system from the initial temperature  $T_1$  ( $^{\circ}\text{C}$ ) to a final temperature  
71  $T_2$  ( $^{\circ}\text{C}$ ),  $C$  is the specific heat capacity of water ( $4.2 \text{ kJ}\cdot^{\circ}\text{C}^{-1}\cdot\text{kg}^{-1}$ ), and  $P_{in}$  ( $\text{kW}\cdot\text{m}^{-2}$ ) is the incident  
72 light power on the solar absorber.

73

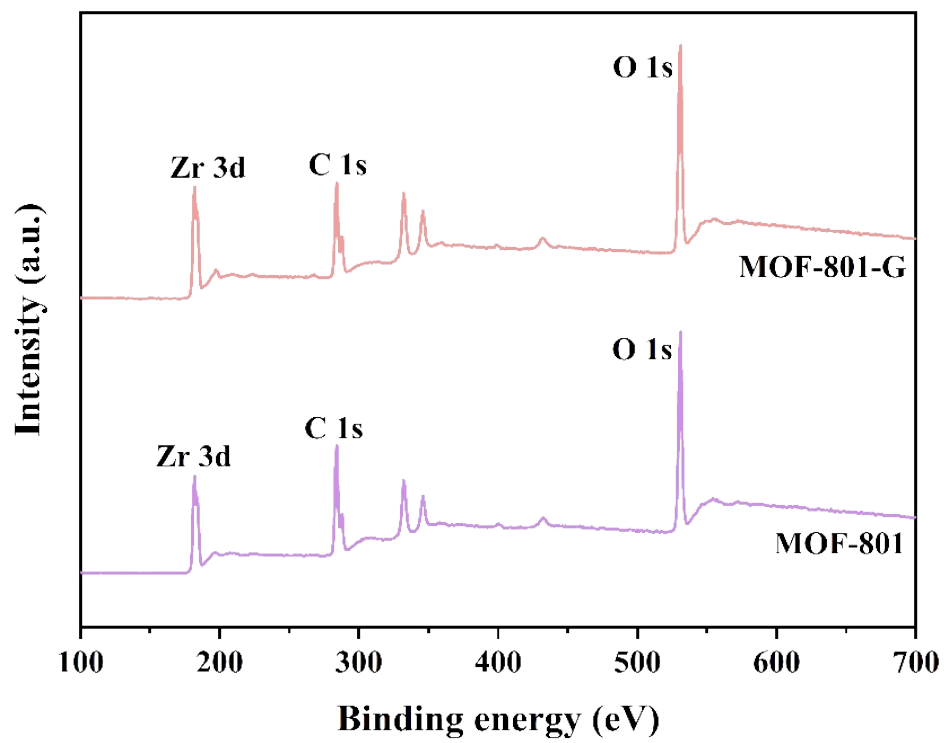

74

75

76

**Figure S1.** XPS survey spectra of MOF-801 and MOF-801-G

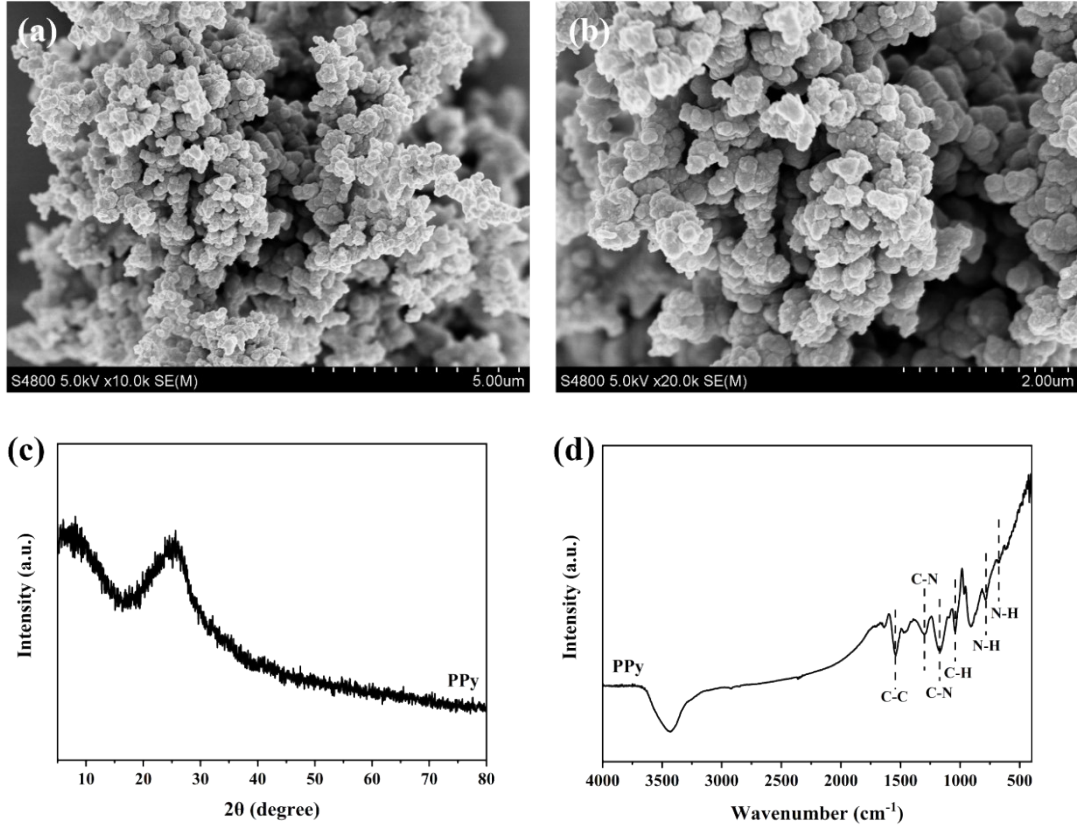

77

78

79

80

**Figure S2.** (a-b) SEM images, XRD, and FTIR of PPy.



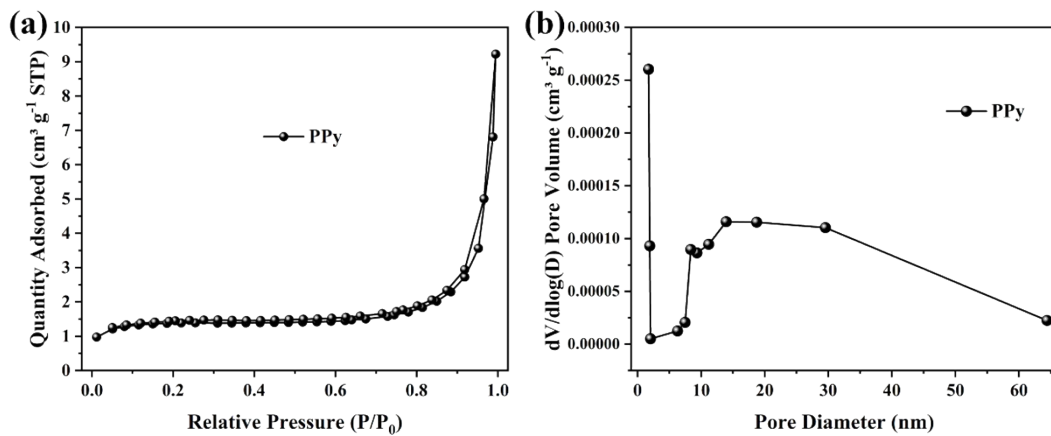

81

82

**Figure S3.** (a)  $N_2$  adsorption-desorption isotherms and (b) pore size distribution of PPy.

83

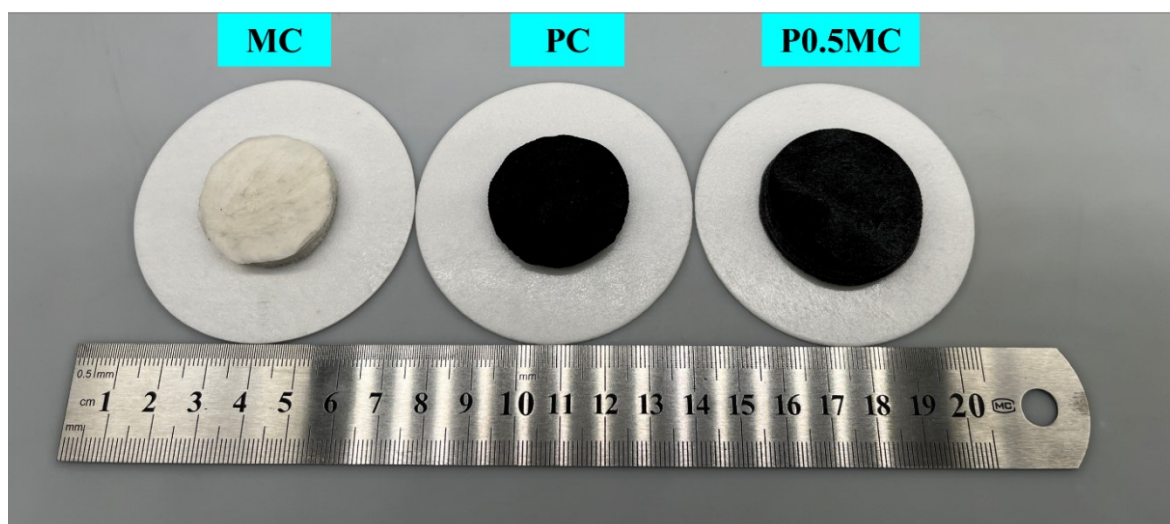

84  
85  
86

**Figure S4.** Digital photographs of MC, PC, and P0.5MC.

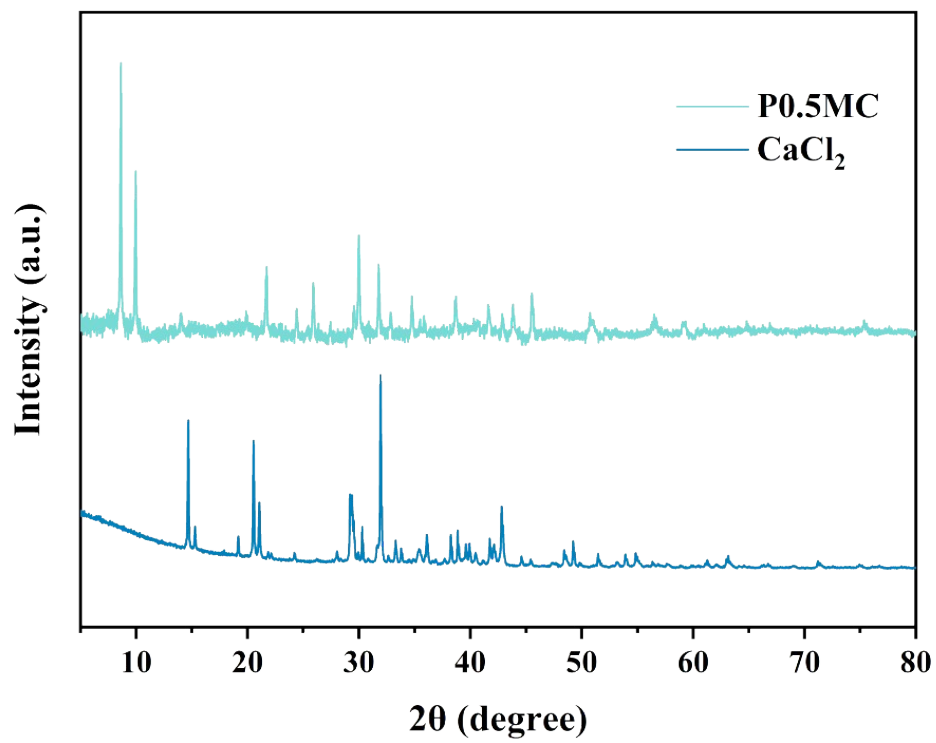

87

88

89

Figure S4. XRD of P0.5MC and CaCl<sub>2</sub>.

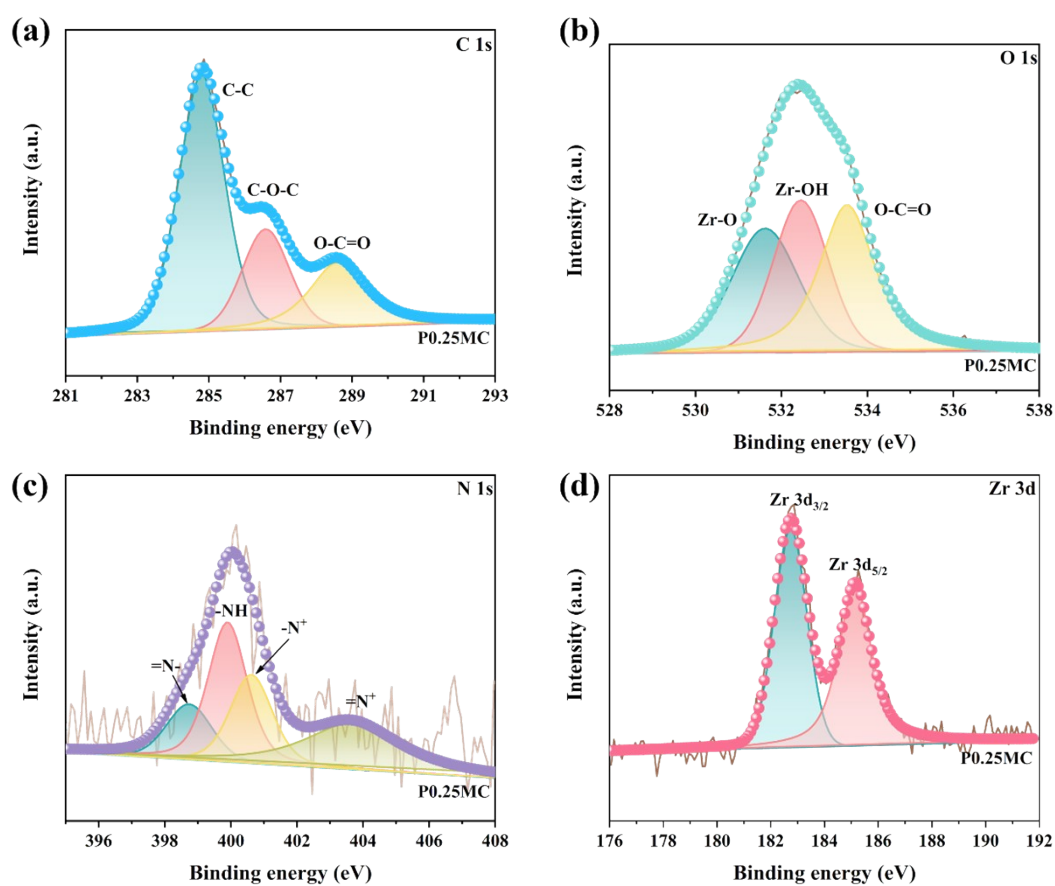

90

91

**Figure S5.** XPS spectrums of P0.25MC: (a) C 1s, (b) O 1s, (c) N 1s, and (d) Zr 3d.

92

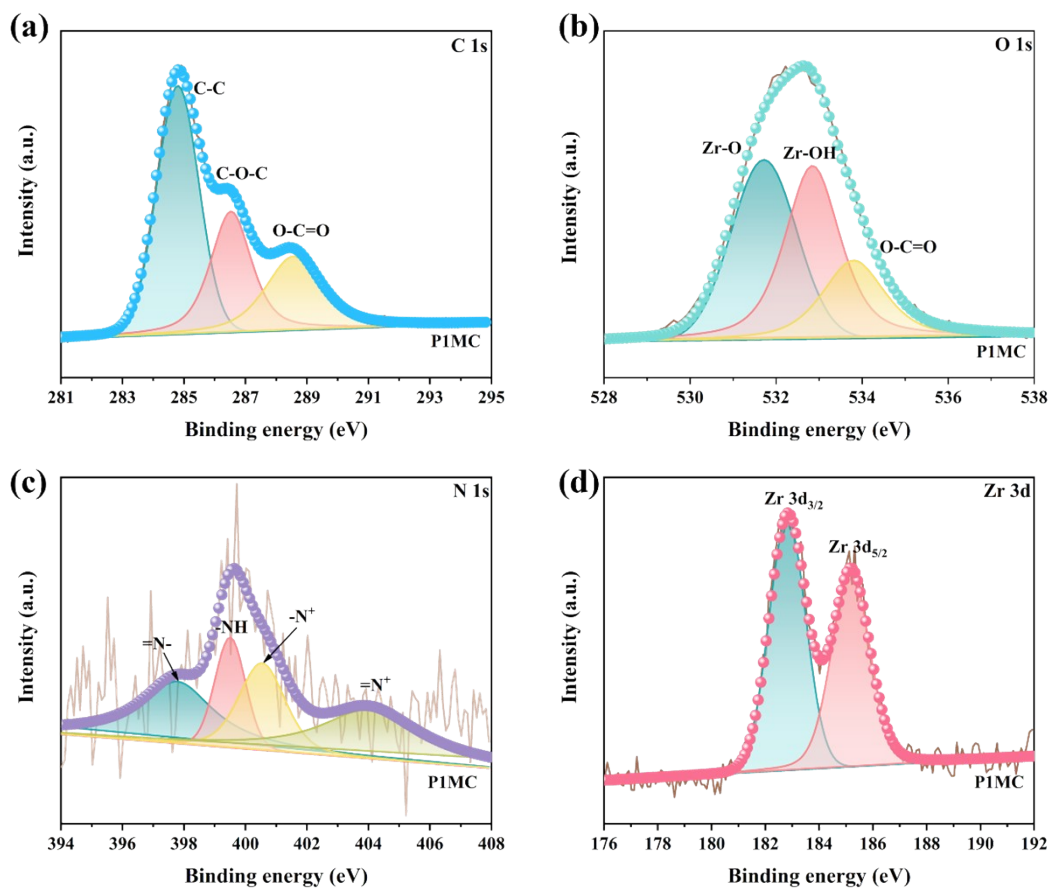

93

94

**Figure S6.** XPS spectra of P1MC: (a) C 1s, (b) O 1s, (c) N 1s, and (d) Zr 3d.

95

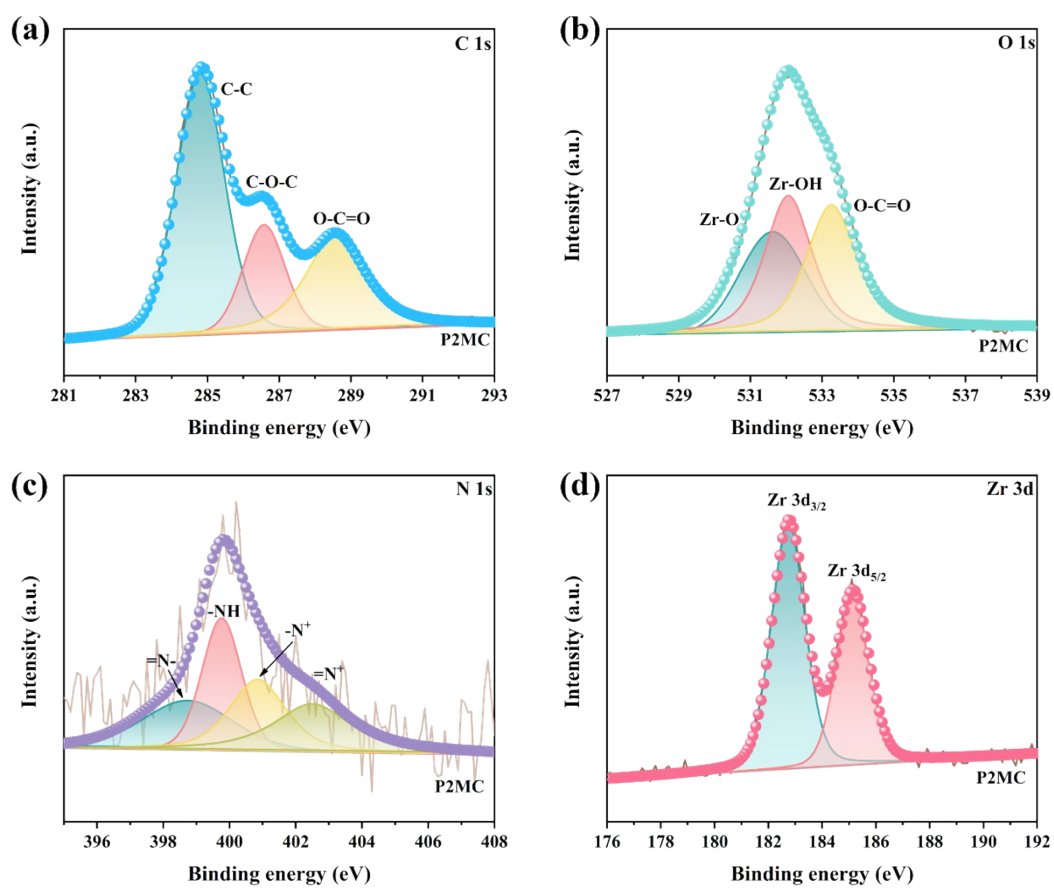

96

97

**Figure S7.** XPS spectra of P2MC: (a) C 1s, (b) O 1s, (c) N 1s, and (d) Zr 3d.

98

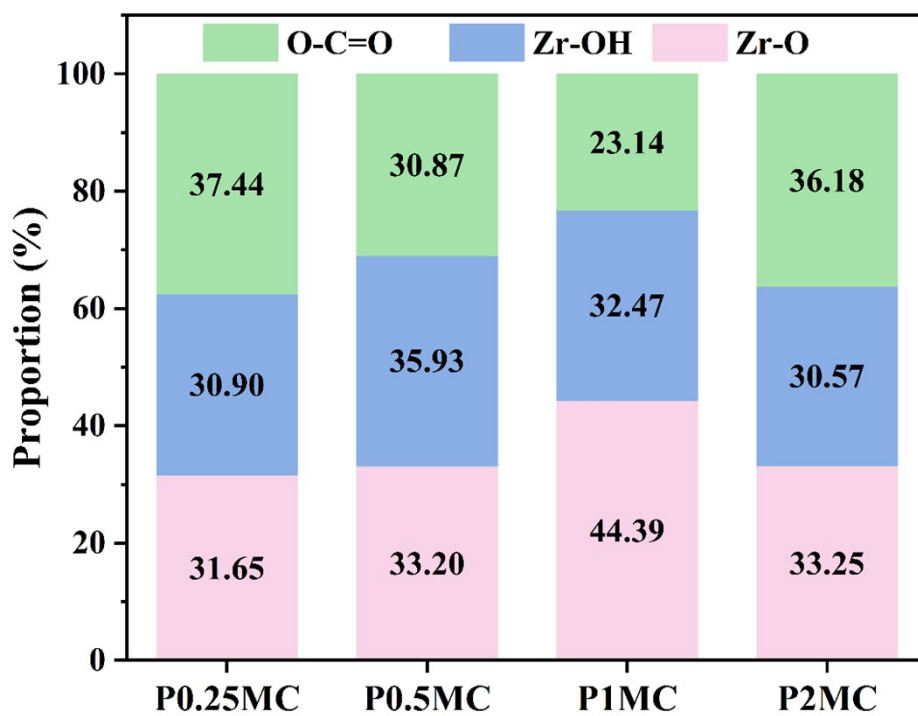

99

100

Figure S8. The ratio of oxygen species in the sample.

101

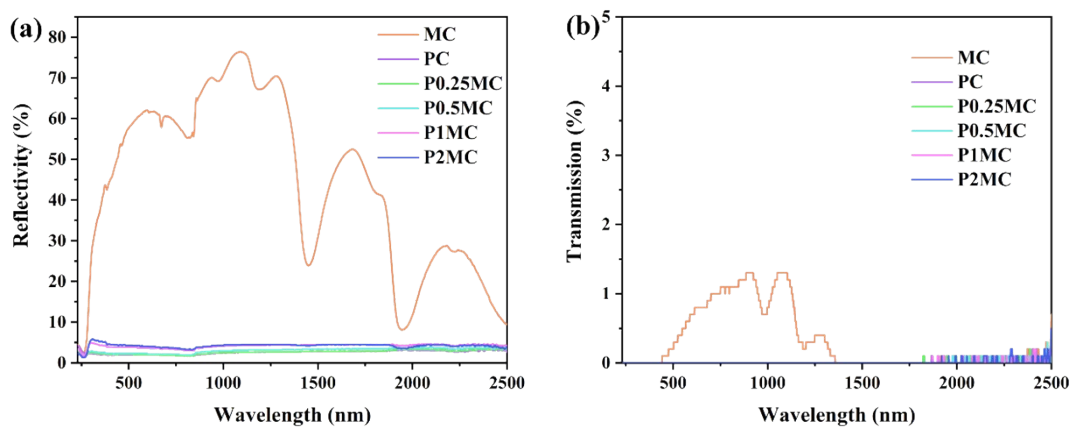

102

103 **Figure S9.** UV-Vis-NIR spectra of MC, PC, P0.25MC, P0.5MC, P1MC, and P2MC: (a) reflectivity and (b)

104

transmission.

105



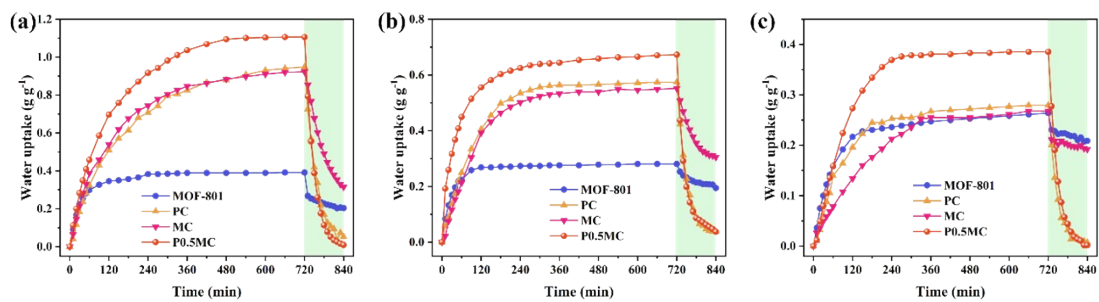

106

107 **Figure S10.** Water uptake of P0.5MC for AWH at 25 °C and (a) 60% RH, (b) 40% RH and (c) 20% RH.

108

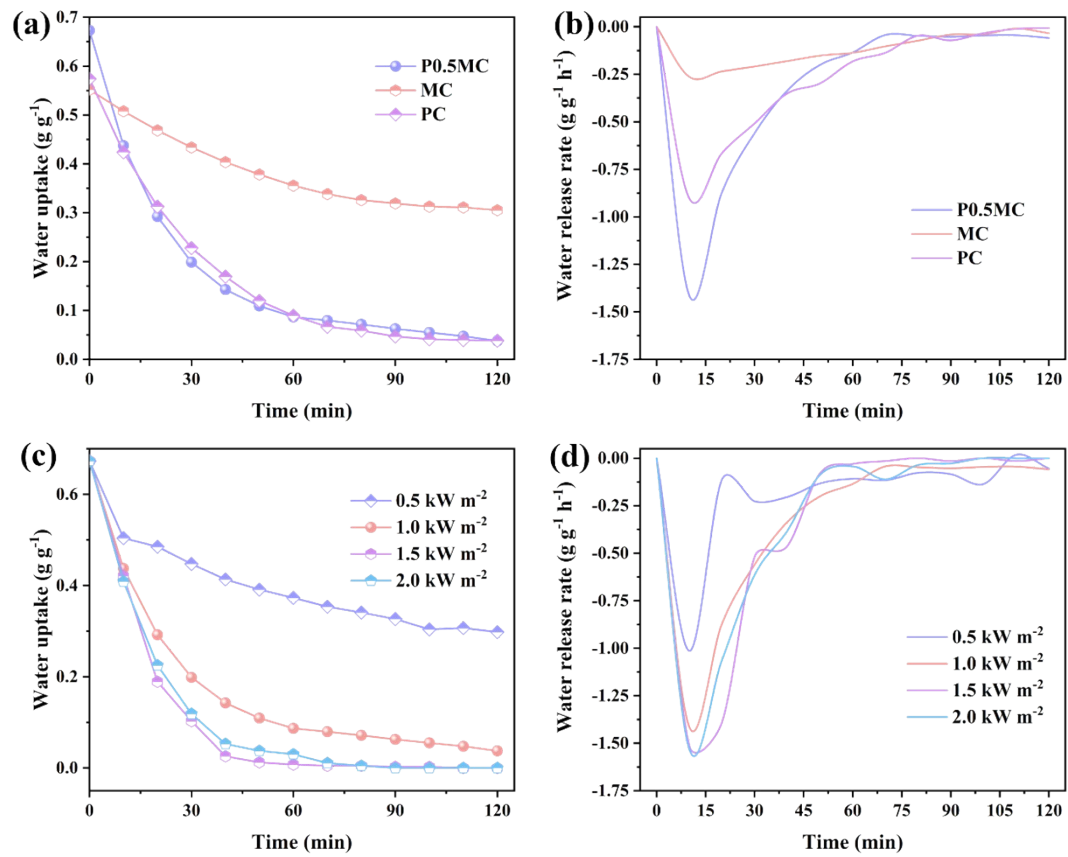

109

110 **Figure S11.** (a) Mass during desorption and (b) water release rate of MC, PC, and P0.5MC under 1.0  $\text{kW}$

111  $\text{m}^{-2}$ . (c) Mass during desorption and (d) water release rate of P0.5MC under different light intensities.

112

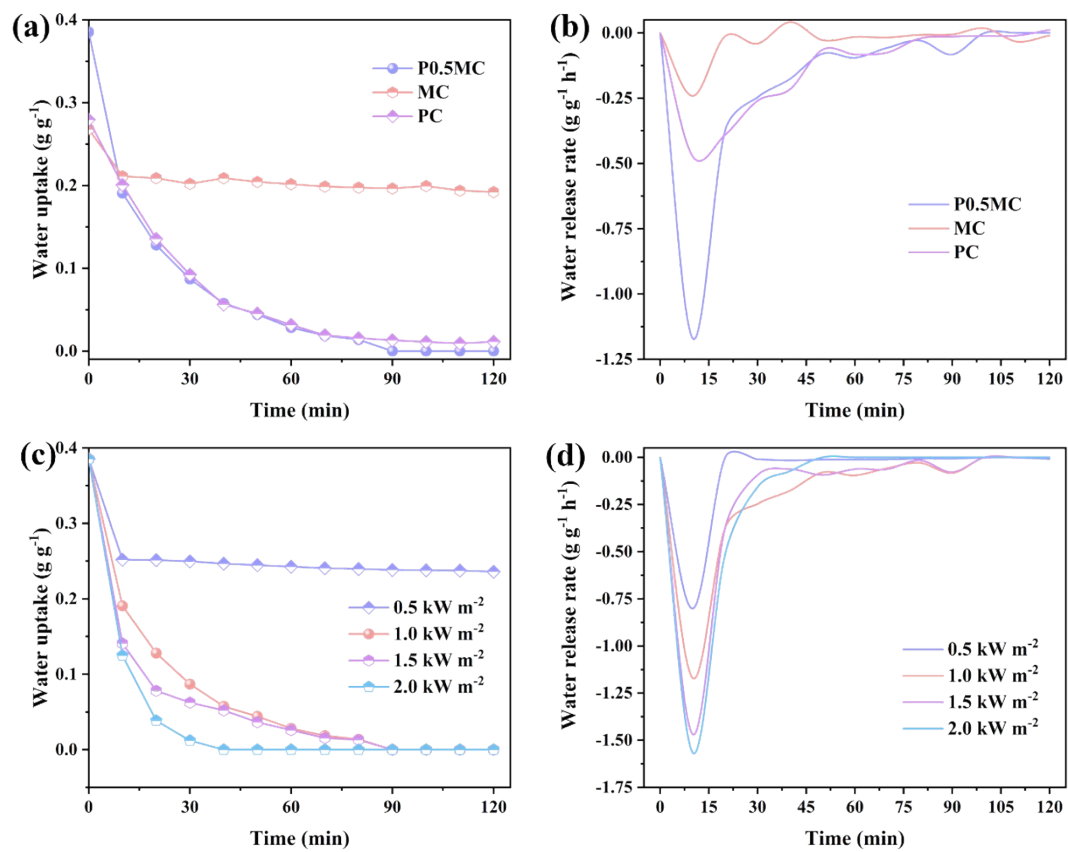

113

114 **Figure S12.** (a) Mass during desorption and (b) water release rate of MC, PC, and P0.5MC under 1.0  $\text{kW}$

115  $\text{m}^{-2}$ . (c) Mass during desorption and (d) water release rate of P0.5MC under different light intensities.

116

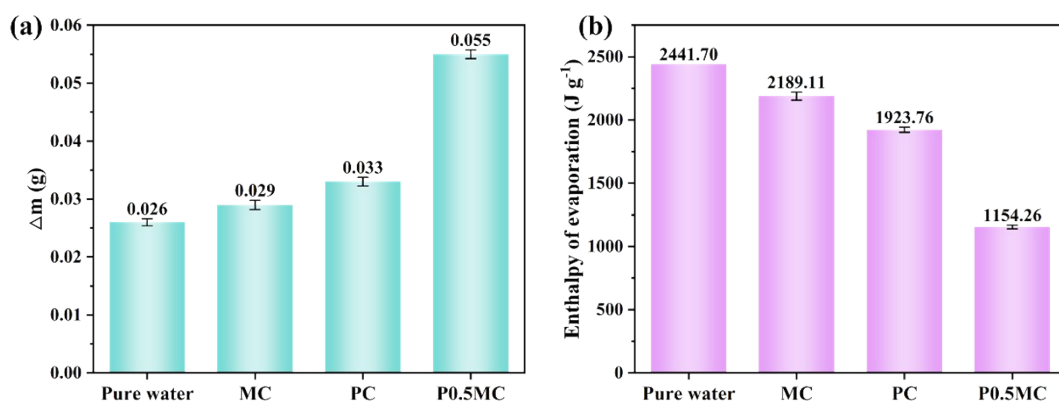

117

118 **Figure S13.** (a) Mass change of pure water, MC, PC, and P0.5MC in dark condition after 1 h. (b)

119

Evaporation Enthalpy of pure water, MC, PC, and P0.5MC.

120

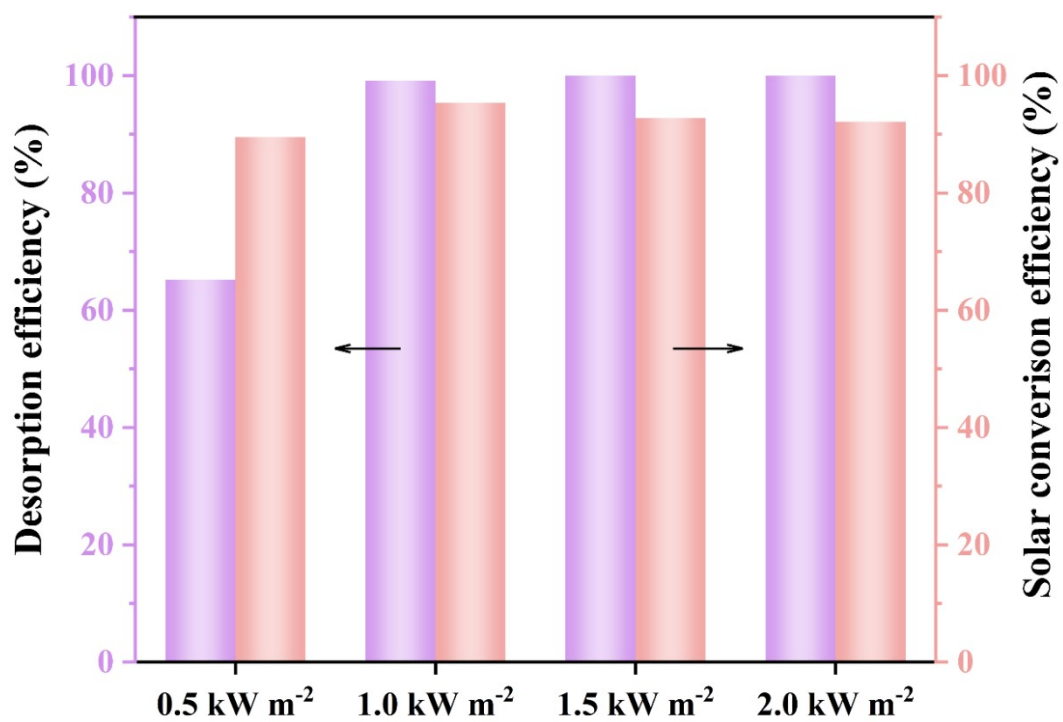

121

122

Figure S14. The desorption efficiency and the solar conversion efficiency

123

124

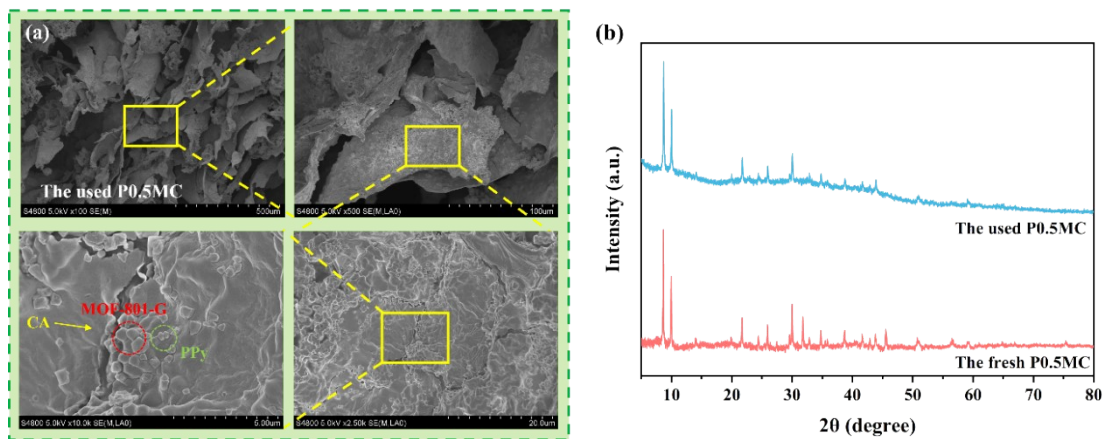

125

126 **Figure S15.** (a) SEM images of the used P0.5MC. (b) XRD spectrums of the fresh P0.5MC and the used

127

P0.5MC.

128

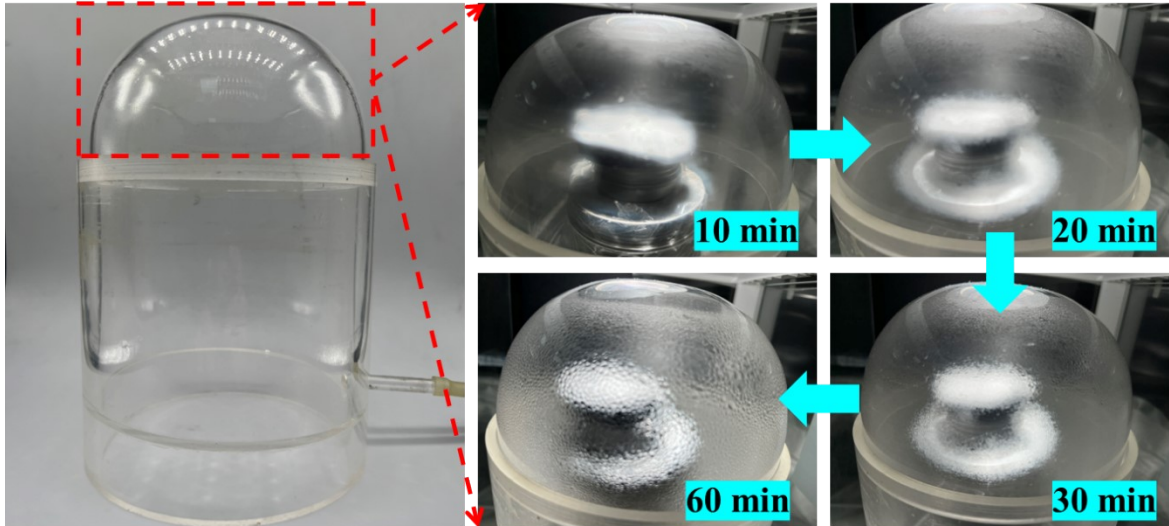

129

130 **Figure S16.** Photographs of the small device (Quartz Rounded Top) used for the AWH experiment and the

131

process of water droplet formation on the walls of the device.

132

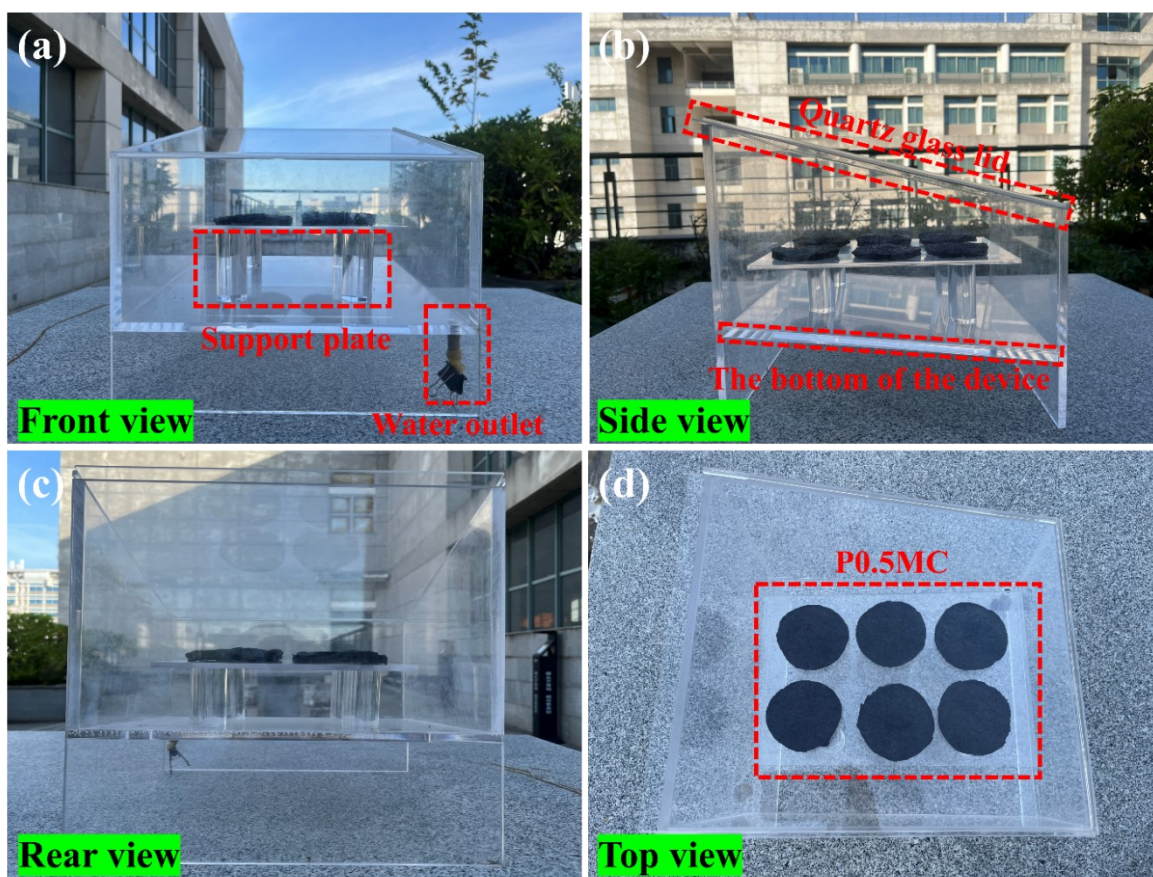

133

134 **Figure S17.** Outdoor water harvesting device diagram: (a) Front view, (b) Side view, (c) Rear view, and (d)

135

Top view.

136



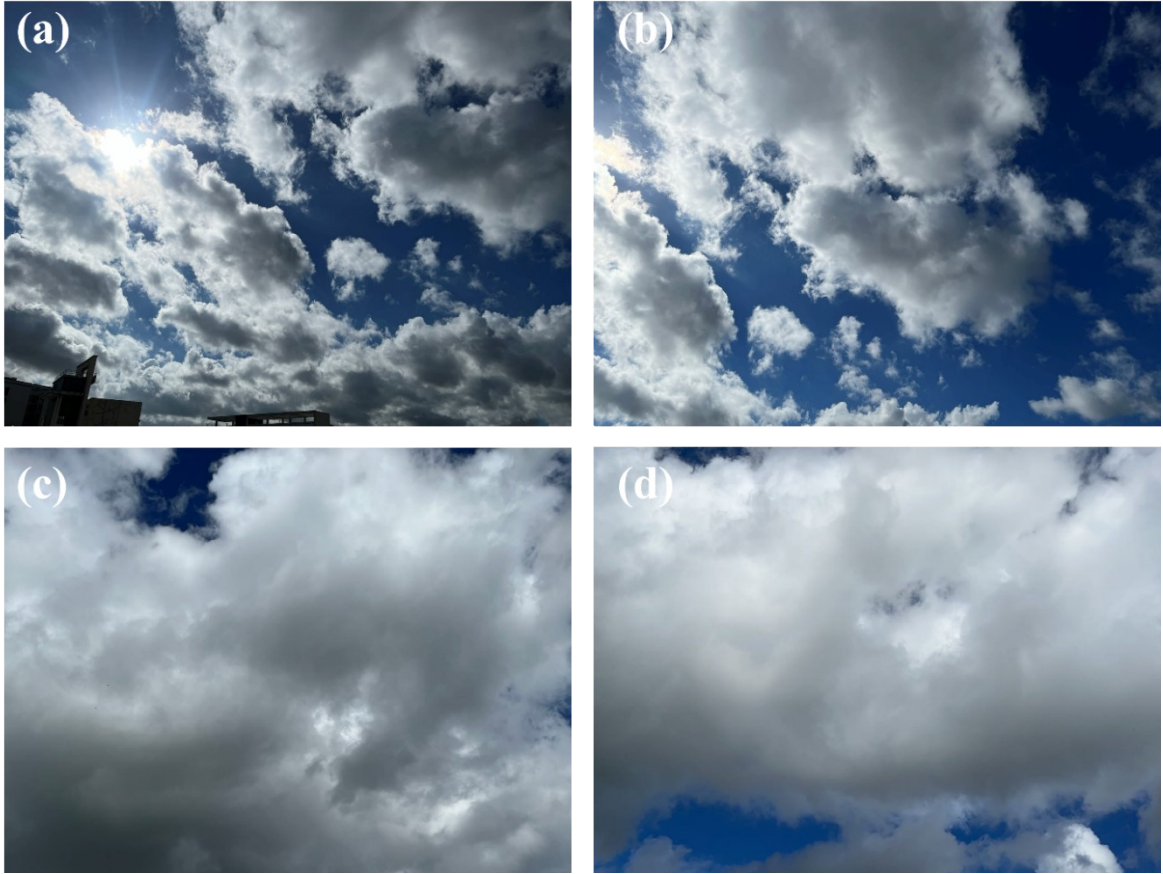

137

138

139

**Figure S18.** Cloudy skies between 7:00 a.m.-10:00 a.m. on July 7, 2024.

---

140 **Table S1.** Comparison of light absorption of different absorbent materials in the wavelength range of

141 230-2500 nm.

| Sample  | Total light absorption | UV absorption<br>(230-400 nm) | Visible light absorption<br>(400-760 nm) | Near-infrared light absorption<br>(760-2500 nm) |
|---------|------------------------|-------------------------------|------------------------------------------|-------------------------------------------------|
| MC      | 55.72%                 | 56.74%                        | 41.63%                                   | 75.08%                                          |
| PC      | 97.44%                 | 97.24%                        | 98.30%                                   | 97.60%                                          |
| P0.25MC | 97.39%                 | 97.18%                        | 98.28%                                   | 97.76%                                          |
| P0.5MC  | 96.95%                 | 96.67%                        | 98.04%                                   | 97.46%                                          |
| P1MC    | 95.88%                 | 95.70%                        | 96.61%                                   | 96.18%                                          |
| P2MC    | 95.84%                 | 95.76%                        | 96.19%                                   | 95.89%                                          |

142

143

| Samples                  | Water uptake (g g <sup>-1</sup> ) |              |              | Ref.             |
|--------------------------|-----------------------------------|--------------|--------------|------------------|
|                          | 20% RH                            | 40% RH       | 60% RH       |                  |
| <b>P0.5MC aerogel</b>    | <b>0.387</b>                      | <b>0.673</b> | <b>1.106</b> | <b>This work</b> |
| MOF-801 powder           | 0.080                             | 0.160        | —            | 4                |
| MOF-801 powder           | 0.225                             | 0.295        | —            | 5                |
| MOF-801 powder           | 0.215                             | 0.225        | 0.305        | 6                |
| MOF-801 powder           | 0.295                             | 0.305        | 0.315        | 7                |
| MOF-801 powder           | 0.145                             | 0.150        | 0.160        | 8                |
| MOF-801 powder           | 0.195                             | 0.205        | 0.215        | 9                |
| MOF-801-hydrazine powder | 0.305                             | 0.375        | 0.400        | 6                |
| MOF-801@P(NIPAM-GMA) gel | 0.315                             | 0.375        | 0.415        | 8                |
| MOF-801/PPG gel          | 0.295                             | 0.310        | 0.400        | 10               |

144 Table S2. Comparison of water absorption of different hygroscopic agents.

145

---

## 146 References

- 147 1. B. Ghalei, K. Wakimoto, C. Y. Wu, A. P. Isfahani, T. Yamamoto, K. Sakurai, M. Higuchi, B. K. Chang,  
148 S. Kitagawa and E. Sivaniah, *Angewandte Chemie International Edition*, 2019, **58**, 19034-19040.
- 149 2. T. H. Lee, J. G. Jung, Y. J. Kim, J. S. Roh, H. W. Yoon, B. S. Ghanem, H. W. Kim, Y. H. Cho, I. Pinnau  
150 and H. B. Park, *Angewandte Chemie International Edition*, 2021, **60**, 13081-13088.
- 151 3. G. C. Shearer, S. Chavan, S. Bordiga, S. Svelle, U. Olsbye and K. P. Lillerud, *Chemistry of Materials*,  
152 2016, **28**, 3749-3761.
- 153 4. G. Tao, X. Chen, Y. Wang, Z. Ding, D. Wang, J. Wang, J. Ding, X. Wang, Z. Cheng and L. Cheng,  
154 *Journal of Cleaner Production*, 2023, **419**, 138296.
- 155 5. Y. Hu, Y. Wang, Z. Fang, X. Wan, M. Dong, Z. Ye and X. Peng, *Journal of Materials Chemistry A*,  
156 2022, **10**, 15116-15126.
- 157 6. X. Yan, F. Xue, C. Zhang, H. Peng, J. Huang, F. Liu, K. Lu, R. Wang, J. Shi, N. Li, W. Chen and M.  
158 Liu, *EcoMat*, 2024, **6**, e12473.
- 159 7. H. Kim, S. Yang, S. R. Rao, S. Narayanan, E. A. Kapustin, H. Furukawa, A. S. Umans, O. M. Yaghi  
160 and E. N. Wang, *Science*, 2017, **356**, 430-434.
- 161 8. C. Yang, H. Wu, J. Yun, J. Jin, H. Meng, J. Caro and J. Mi, *Advanced Materials*, 2023, **35**, 2210235.
- 162 9. Y. Lv, J. Wu, J. Dong and T. Jia, *Journal*, 2024, **14**, 472.
- 163 10. Y. He, T. Fu, L. Wang, J. Liu, G. Liu and H. Zhao, *Chemical Engineering Journal*, 2023, **472**, 144786.  
164
